# Supplementary material
Source: publisher site journal article supplement (https://www.spandidos-publications.com/8530/downloadSupplementary)
Supplement: Supplementary file 1 [file downloadSupplementary]

## Sheet: Supplementary Table 1
Table SI. Hallmark enrichment (PpIX-low).
Pathway	Direction	NES	ES	P-value	Adjusted P-value	Genes	LeadingEdge
TNFA_SIGNALING_VIA_NFKB	Depleted in C	-2.70308	-0.632193	2.56947554981475e-22	1.28473777490738e-20	199	FOSB; GEM; MAFF; SPSB1; IL1B; GADD45B; ATF3; RHOB; TRIB1; FOSL1; NAMPT; SGK1; KLF2; BMP2; KLF6; DUSP1; INHBA; EGR2; DUSP5; ETS2; RCAN1; ZFP36; IER2; LIF; SOD2; NFIL3; MYC; PPP1R15A; MAP3K8; EGR1; PNRC1; FOSL2; CEBPB; MAP2K3; PDE4B; EHD1; LDLR; TNFAIP2; RIPK2; BTG1; IFIT2; PDLIM5; DUSP4; FOS; HBEGF; MXD1; SOCS3; SERPINB8; CCN1; CLCF1; PTGER4; KLF4; CD44; GADD45A; RNF19B; REL; PHLDA1; NR4A3; RELA; …
INTERFERON_GAMMA_RESPONSE	Depleted in C	-2.09893	-0.489275	1.63371814704269e-09	1.63371814704269e-08	198	C1S; IFIT1; BST2; OASL; SOCS1; C1R; NAMPT; PELI1; PNP; IFITM2; IFITM3; SECTM1; RSAD2; SOD2; ISG15; HELZ2; MX1; ARID5B; DHX58; UPP1; CASP3; PDE4B; IRF9; TNFAIP2; RIPK2; BTG1; IFIT2; STAT2; HLA-DMA; SOCS3; PLA2G4A; HLA-DRB1; SERPING1; IL10RA; STAT1; MT2A; SAMD9L; HLA-A; CD86; BPGM; ICAM1; CDKN1A; CD274; CASP4; CCL2; RBCK1; TNFAIP6; EIF4E3
INFLAMMATORY_RESPONSE	Depleted in C	-1.93628	-0.451735	6.90805480348829e-08	4.93432485963449e-07	200	CCR7; BST2; IFITM1; IL1B; SLC4A4; SGMS2; NAMPT; KLF6; INHBA; LIF; MYC; DCBLD2; PDE4B; LDLR; RIPK2; IRAK2; AHR; HBEGF; MXD1; AXL; IL1R1; IL10RA; PTGER4; RELA; MMP14; ICAM1; CDKN1A; F3; ITGA5; SLC11A2; SLC1A2; CCL2; EDN1; ABI1; TNFAIP6; OSMR; ATP2C1; CD70
CHOLESTEROL_HOMEOSTASIS	Depleted in C	-1.91866	-0.522695	5.70679352728028e-05	0.00028534	74	ATF3; HMGCS1; HMGCR; CLU; ERRFI1; NFIL3; SQLE; PNRC1; IDI1; NSDHL; TM7SF2; LDLR; CBS; TNFRSF12A; HSD17B7; ALDOC; GSTM2; MVD; GNAI1; FDFT1; CPEB2; CYP51A1; LSS; ACAT2; TRIB3; PCYT2; TMEM97; LGALS3; ACTG1; SREBF2; MVK; STARD4; SCD
INTERFERON_ALPHA_RESPONSE	Depleted in C	-1.81974	-0.475834	3.96823552955406e-05	0.000220458	97	C1S; BST2; OASL; IFITM1; IFITM2; IFITM3; RSAD2; ISG15; HELZ2; MX1; DHX58; IRF9; RIPK2; IFIT2; STAT2
KRAS_SIGNALING_UP	Depleted in C	-1.72861	-0.403285	1.76329497098505e-05	0.000110206	200	GPNMB; SERPINA3; SLPI; SPARCL1; ANGPTL4; IL1B; TRIB1; BMP2; INHBA; MMP10; LIF; GLRX; AKAP12; PPP1R15A; DCBLD2; PRRX1; LY96; KIF5C; USP12; HBEGF; IL33; SPP1; HDAC9; IL10RA; KLF4; MTMR10; BPGM; RBM4; PLAU; RABGAP1L; IGFBP3; F2RL1; PCP4; TSPAN7; SPRY2; SDCCAG8; EMP1
HYPOXIA	Depleted in C	-1.68074	-0.391791	8.10180743926537e-05	0.000368264	198	PPP1R3C; ANGPTL4; MAFF; ATF3; KLF6; DUSP1; DTNA; ZFP36; GLRX; ERRFI1; AKAP12; NFIL3; PPP1R15A; PNRC1; FOSL2; CCN2; MXI1; MT1E; PPARGC1A; BTG1; NEDD4L; FOS; ALDOC; FAM162A; CITED2; GPC1; DDIT3; NDRG1; CAV1; CCN1; HEXA; GYS1; DPYSL4; MT2A; HMOX1; RORA; VEGFA; JUN; CDKN1A; F3; COL5A1; HK2; IGFBP3; SLC2A3; SCARB1; NCAN; BNIP3L; PRKCA; TMEM45A; LOX; ATP7A; BHLHE40; RRAGD; IL6; SDC4; TGFB3; CAVIN1; ENO…
IL2_STAT5_SIGNALING	Depleted in C	-1.65794	-0.386476	0.000130991	0.000545794	198	MAFF; SOCS1; GADD45B; RHOB; DHRS3; BMP2; KLF6; PNP; IFITM3; HOPX; LIF; NFIL3; MYC; MAP3K8; SLC39A8; SERPINB6; CASP3; SPRED2; WLS; MUC1; AHR; GABARAPL1; MXD1; NDRG1; IL1RL1; SMPDL3A; SPP1; IL10RA; CD44; PHLDA1; CD86; RORA; LRRC8C; PRAF2; RABGAP1L; HK2; SLC2A3; MAP6; NOP2; HUWE1; PLEC; HIPK2; PUS1; EMP1; BHLHE40; RRAGD
MYOGENESIS	Depleted in C	-1.6309	-0.380173	0.000211534	0.000813591	198	PPP1R3C; GADD45B; PDE4DIP; SLN; CLU; DTNA; PTP4A3; ITGB4; LPIN1; CFD; IFRD1; SORBS1; TPM2; LAMA2; SOD3; KLF5; GNAO1; SPTAN1; HSPB8; HBEGF; TPD52L1; APP; PVALB; AGRN; CDKN1A; DENND2B; FHL1; TAGLN; ACHE; MEF2C; IGFBP3; ABLIM1; PFKM; BHLHE40; BDKRB2; SLC6A8; PKIA; EIF4A2; FLII; CDH13; SCD; NOTCH1; SPEG; KCNH2; FGF2; ADCY9; CAV3; RIT1; GAA
EPITHELIAL_MESENCHYMAL_TRANSITION	Depleted in C	-1.60667	-0.374837	0.000256634	0.000911978	200	GEM; GADD45B; RHOB; INHBA; RGS4; CXCL12; PRRX1; NNMT; DST; MATN2; CD59; CCN2; SNTB1; LAMC2; TPM2; LAMA2; THBS1; TNFRSF12A; FMOD; THBS2; SPOCK1; CALD1; GPC1; THY1; OXTR; PRSS2; GLIPR1; CCN1; SPP1; QSOX1; PLOD2; FLNA; LOXL2; FERMT2; CD44; GADD45A; COL16A1; PTHLH; VEGFA; MMP14; JUN; SNAI2; COL5A1; ITGA5; TAGLN; IGFBP3; PLOD1; VCAN; LOX; FBLN5; PMEPA1; SLC6A8; IL6; SDC4; COL1A2
P53_PATHWAY	Depleted in C	-1.56523	-0.366074	0.000636346	0.00198858	199	NUPR1; SOCS1; ATF3; BMP2; CTSF; ABHD4; LIF; SFN; ITGB4; BAIAP2; PPP1R15A; TM4SF1; UPP1; PVT1; BTG1; ABAT; ABCC5; STOM; FOS; HBEGF; FAM162A; TPD52L1; MXD1; DDIT3; NDRG1; AEN; FBXW7; APP; CTSD; HEXIM1; DGKA; ZNF365; GM2A; KLF4; GADD45A; RNF19B; HMOX1; JUN; PLK3; CDKN1A; RALGDS; POM121; TSC22D1; SLC7A11; EPHX1; DDB2; PLK2; TRIB3; F2R
APOPTOSIS	Depleted in C	-1.54347	-0.372435	0.0015199	0.00447031	161	IL1B; WEE1; GADD45B; ATF3; RHOB; NEDD9; BMP2; IFITM3; CLU; TIMP2; SOD2; HGF; CASP3; LMNA; TNFRSF12A; FEZ1; SPTAN1; DDIT3; RHOT2; ANXA1; PPP2R5B; APP; CAV1; CD44; CTH; GADD45A; RNASEL; HMOX1; RELA; JUN; TGFB2; CDKN1A; CASP4; ETF1; SQSTM1; BNIP3L; F2R; EGR3; EMP1; IL6; LGALS3; PLAT; ENO2; ADD1; CFLAR; H1-0
IL6_JAK_STAT3_SIGNALING	Depleted in C	-1.5319	-0.403973	0.0102767	0.0256918	87	IL1B; SOCS1; MAP3K8; IRF9; STAT2; TNFRSF12A; SOCS3; IL1R1; STAT1; CD44; HMOX1; JUN; OSMR; CNTFR; IL6ST; IL6; PLA2G2A; PTPN1; IL17RB
COMPLEMENT	Depleted in C	-1.48874	-0.348183	0.00287599	0.0075684	199	C1S; SPOCK2; MAFF; C1R; MT3; DUSP5; CLU; PHEX; TIMP2; LAMP2; DOCK10; CTSO; CEBPB; CD59; CASP3; EHD1; MMP15; DOCK4; PLA2G4A; ANG; PRCP; CTSD; SERPING1; MMP14; F3; CASP4; GATA3; CTSL; C3; CTSC; IL6; LGALS3; PLAT; GNAI3; JAK2; ZEB1; CDH13; FN1; SCG3; GCA; ERAP2; PSEN1; GZMB; GNG2; PLAUR; PIK3CA; USP14; CASP10; USP16; IRF7; APOC1
KRAS_SIGNALING_DN	Depleted in C	-1.48832	-0.348087	0.00287599	0.0075684	199	SELENOP; SGK1; EFHD1; RSAD2; MX1; RGS11; TENT5C; CLSTN3; BMPR1B; KLHDC8A; GPRC5C; SLC25A23; AKR1B10; TNNI3; IDUA; TGFB2; EDN1; CNTFR; PAX4; PDK2; KCNQ2; GPR3; EGF; NR6A1; COQ8A; MAGIX; EPHA5; ITGB1BP2; ENTPD7; ASB7; ZNF112; KRT15; FGFR3; FGGY; SLC38A3; ALOX12B; GRID2; P2RX6; CELSR2; SLC30A3; SNN; TG; ADRA2C; HSD11B2; COPZ2; VPS50; MTHFR; SPRR3; ARHGDIG; PRODH; NR4A2
COAGULATION	Depleted in C	-1.40526	-0.344259	0.0120273	0.0286363	138	C1S; MAFF; C1R; DUSP14; CLU; MMP10; LAMP2; CFD; CTSO; CFI; MMP15; THBS1; PROS1; MST1; ANG; ANXA1; SERPING1; MMP14; CAPN5; F3; PLAU; WDR1; C3; PRSS23; RGN; MMP7; ARF4; PLAT; HTRA1; TF; RAPGEF3; FN1; KLF7; USP11; C8G; BMP1
ANDROGEN_RESPONSE	Depleted in C	-1.3974	-0.363492	0.0167198	0.0379995	101	SELENOP; SGK1; HMGCS1; HMGCR; INSIG1; AKAP12; PTK2B; ARID5B; IDI1; MAK; PDLIM5; ELL2; BMPR1B; AZGP1; DNAJB9; NDRG1; ADAMTS1; CDC14B; DHCR24; MAF; TSC22D1; UAP1; PMEPA1; SLC38A2; GNAI3; TNFAIP8; H1-0; SCD; LIFR; SRP19
TGF_BETA_SIGNALING	Depleted in C	-1.28959	-0.373003	0.0968523	0.179356	54	CDH1; BMP2; PPP1R15A; THBS1; APC; NCOR2; HIPK2; PMEPA1; KLF10; JUNB; SKI; ID1; SMAD1
UV_RESPONSE_DN	Depleted in C	-1.28579	-0.313692	0.0468865	0.0976803	143	DUSP1; RGS4; INSIG1; ADD3; RND3; ATP2B4; MYC; FHL2; KALRN; MGLL; LDLR; MT1E; PDLIM5; CITED2; MAGI2; CAV1; CCN1; VAV2; TOGARAM1; DMAC2L; F3; SNAI2; ABCC1; PRKCA; ATP2C1; ARHGEF9; FBLN5; ATRX; BHLHE40; RASA2; MAP1B; COL1A2; PRKCE; SYNE1; LPAR1; ANXA2; SRI; ID1; RXRA; PMP22
ESTROGEN_RESPONSE_EARLY	Depleted in C	-1.15046	-0.267977	0.11828	0.211214	197	DHRS3; MAPT; ELOVL2; CXCL12; NRIP1; SFN; ADD3; MYC; FHL2; MAST4; ABAT; MUC1; FOS; HSPB8; TPD52L1; FOXC1; FDFT1; PLAAT3; RETREG1; KLF4; CD44; TMEM164; MINDY1; DHRS2; NCOR2; SCARB1; ABLIM1; RAB17; PRSS23; RHOBTB3; CHPT1; EGR3; BHLHE40; IL6ST; GAB2; KLK10; KLF10; RET; CALCR; JAK2; IL17RB; LRIG1; ADCY9; BLVRB; KRT15; HES1; MED13L; GFRA1; DEPTOR; CCN5; SLC7A5; OLFM1; SEMA3B; CELSR2
ESTROGEN_RESPONSE_LATE	Depleted in C	-1.13373	-0.26408	0.145161	0.234131	197	SERPINA3; CDH1; MAPT; SGK1; GPER1; CXCL12; ZFP36; NRIP1; SFN; ADD3; ATP2B4; ALDH3A2; SNX10; LAMC2; FOS; HSPB8; TPD52L1; FOXC1; FDFT1; PLAAT3; CAV1; XRCC3; KLF4; CD44; UNC13B; DHRS2; NCOR2; PCP4; SCARB1; PRSS23; ASCL1; CHPT1; EGR3
ALLOGRAFT_REJECTION	Depleted in C	-1.13325	-0.264389	0.129477	0.223235	200	IL1B; SOCS1; INHBA; LIF; RIPK2; HLA-DRA; AARS1; HLA-DMB; HLA-DMA; IKBKB; THY1; HDAC9; FLNA; STAT1; GBP2; HLA-A; CD86; ICAM1; TGFB2; ACHE; CCL2; RPS3A; ABI1; CD79A; GALNT1; F2R
MTORC1_SIGNALING	Depleted in C	-1.09675	-0.256648	0.203857	0.318526	196	NUPR1; TUBA4A; NAMPT; PNP; HMGCS1; HMGCR; INSIG1; GLRX; ADD3; NFIL3; SQLE; PPP1R15A; IFRD1; IDI1; MAP2K3; TM7SF2; LDLR; GCLC; PSAT1; DDIT3; PLOD2; CTH; CYP51A1; DHCR24; PDAP1; CDKN1A; ASNS; RDH11; HK2; SLC7A11; ETF1; SLC2A3; PSMD13; SQSTM1; TRIB3; CTSC; TMEM97; SKAP2; BHLHE40; TXNRD1; ADIPOR2
HEME_METABOLISM	Depleted in C	-1.05611	-0.246392	0.278237	0.409172	200	SLC6A9; LAMP2; KAT2B; SLC30A1; MAP2K3; TENT5C; MXI1; KLF3; LMO2; ELL2; GCLC; BACH1; DAAM1; PPP2R5B; RIOK3; CLCN3; OPTN; MARCHF2; TOP1; BPGM; GCLM; ASNS; SLC11A2; ACP5; SLC7A11; HTATIP2; C3; BNIP3L; CTNS; SLC6A8; RCL1; RAP1GAP; AGPAT4; LPIN2; HBQ1; MFHAS1; SIDT2; ADD1; H1-0; NUDT4; KDM7A; RBM5; PICALM; ICAM4; H4C3; ALDH6A1; BLVRB
HEDGEHOG_SIGNALING	Depleted in C	-1.02833	-0.323529	0.391924	0.515689	36	ADGRG1; ETS2; NRP2; THY1; VEGFA; ACHE; TLE1; NRCAM; SLIT1; CNTFR; OPHN1; NF1
XENOBIOTIC_METABOLISM	Depleted in C	-0.997814	-0.232597	0.469003	0.586253	198	APOE; TPST1; ETS2; AKR1C3; ABHD6; UPP1; PDLIM5; ARG2; GCLC; PTGDS; SERTAD1; GABARAPL1; PROS1; IL1R1; MT2A; HMOX1; MAOA; TGFB2; ALDH3A1; EPHX1; AP4B1; ACOX1; TMEM97; RAP1GAP; CYP2J2; IDH1; LPIN2; CYP27A1; ENTPD5
UV_RESPONSE_UP	Depleted in C	-0.96257	-0.23283	0.555263	0.67715	156	FOSB; ATF3; RHOB; TUBA4A; BMP2; SOD2; CASP3; BTG1; FOS; DGAT1; NTRK3; HMOX1; MMP14; MAOA; ICAM1; PDAP1; EIF5; ASNS; AGO2; DNAJB1; EPHX1; SQSTM1; PTPRD; SLC6A8; IL6ST; IL6; CEBPG; STARD3; RET; ENO2; JUNB; TYRO3
UNFOLDED_PROTEIN_RESPONSE	Depleted in C	-0.949904	-0.242202	0.573232	0.682419	112	IFIT1; ATF3; DDX10; CHAC1; CEBPB; ATF4; PSAT1; DNAJB9; NABP1; EIF4E; HERPUD1; VEGFA; ASNS; DCP1A; CCL2; PARN; NOP56; WIPI1; EIF4A2; CEBPG; NOLC1; EXOSC10; SERP1
BILE_ACID_METABOLISM	Depleted in C	-0.85055	-0.216869	0.825758	0.878466	112	BBOX1; ALDH1A1; IDI1; PNPLA8; HSD3B7; OPTN; GCLM; DHCR24; ABCA5; PEX11G; PFKM; IDH1; CYP27A1; CROT; ACSL5; RXRA
APICAL_JUNCTION	Depleted in C	-0.843604	-0.19665	0.921833	0.960243	198	CLDN4; CDH1; INSIG1; CLDN11; ITGB4; BAIAP2; SIRPA; LAMC2; ADAM23; INPPL1; MVD; GNAI1; THY1; VAV2; COL16A1; CD86; ICAM1; THBS3; NEXN; CD274; MAP3K20; VCAN; SKAP2; SYMPK; NRXN2; NF1; CDH11; ACTG1; CDH3; TMEM8B; MAPK11; SPEG; WASL; KCNH2; ICAM4; RAC2; CLDN9; CERCAM; BMP1; PBX2; LAMA3; FBN1; YWHAH; SLC30A3; VWF; EGFR; MAPK13
REACTIVE_OXYGEN_SPECIES_PATHWAY	Depleted in C	-0.820519	-0.243326	0.790588	0.877423	49	GLRX; SOD2; GCLC; FTL; SBNO2; GCLM; SRXN1; ABCC1; TXNRD1; JUNB; HMOX2; MGST1; TXNRD2; ERCC2
PANCREAS_BETA_CELLS	Enriched in C	0.684577	0.219694	0.95986	0.963816	40	FOXO1; SRP9; INSM1; INS; SPCS1; SEC11A; GCK; SCGN; AKT3
PEROXISOME	Enriched in C	0.727208	0.197391	0.963816	0.963816	103	MSH2; CRAT; HRAS; GNPAT; CRABP2; SCP2; IDH2; SLC25A19; CNBP; HSD17B11; TOP2A; PEX11B; CLN6; SOD1; PEX13; MLYCD; CTPS1; CADM1; SIAH1; VPS4B; ITGB1BP1; LONP2; EPHX2; ABCB9; ATXN1; ISOC1; FADS1; GSTK1; IDE; CTBP1; TSPO; ALDH9A1
ANGIOGENESIS	Enriched in C	0.793857	0.260449	0.807229	0.877423	36	NRP1; TIMP1; ITGAV; CCND2; KCNJ8; LRPAP1; S100A4; LPL; PTK2; JAG2
APICAL_SURFACE	Enriched in C	0.87816	0.275723	0.674061	0.765979	44	SRPX; MDGA1; GAS1
GLYCOLYSIS	Enriched in C	0.930475	0.230264	0.656101	0.762909	198	NT5E; TGFBI; CXCR4; HMMR; AURKA; GPC4; CENPA; GUSB; LDHA; POLR3K; PPIA; STMN1; MET; DEPDC1; KIF20A; B3GALT6; MDH2; EXT2; IER3; HAX1; KDELR3; GMPPA; HSPA5; PDK3; PKM; TXN; GOT2; ALG1; MDH1; SLC25A10; B4GALT2; GALK2; CLN6; ENO1; PAXIP1; SOD1; NDUFV3; B4GALT1; CHST12; GFPT1; P4HA2; SLC37A4; PGLS; CYB5A; UGP2; RARS1; PRPS1; CASP6; CHPF2; GLCE; XYLT2; RPE; PGAM1; MIF; B4GALT4; GFUS; PYGB; ME2; COG2; G…
FATTY_ACID_METABOLISM	Enriched in C	1.0007	0.254482	0.4672	0.586253	155	LGALS1; LDHA; CRAT; DECR1; SMS; MDH2; HSD17B10; PCBD1; METAP1; SUCLA2; BLVRA; ADSL; H2AZ1; HSP90AA1; FH; OSTC; GRHPR; MCEE; HSPH1; CBR3; RAP1GDS1; HADH; HSD17B11; PDHA1; MDH1; AADAT; APEX1; AUH; CRYZ; ODC1; PRDX6; SUCLG1; MLYCD; KMT5A; NBN; UROS; PDHB; ECI1; ACSS1; BCKDHB; SLC22A5; HCCS; UBE2L6; RDH16; ACAA2; MIF; CPOX
PROTEIN_SECRETION	Enriched in C	1.04733	0.286581	0.377517	0.510158	96	ANP32E; KRT18; CD63; GNAS; ZW10; DNM1L; ARCN1; ERGIC3; ARFGAP3; AP3S1; SEC31A; ARFIP1; AP2M1; AP2S1; YIPF6; YKT6; SOD1; MAPK1; ADAM10; ARF1; AP1G1; AP2B1; USO1; VPS4B; RER1; STX7; TMED2; CLTA; RPS6KA3; SCAMP3; COPE; TPD52; ICA1; VAMP4; COG2
MYC_TARGETS_V2	Enriched in C	1.052	0.311629	0.370805	0.510158	57	MCM5; SORD; CBX3; DCTPP1; SLC19A1; RABEPK; UNG; NPM1; HSPD1; SRM; MCM4; AIMP2; PA2G4
ADIPOGENESIS	Enriched in C	1.06564	0.263713	0.299525	0.427892	198	ITGA7; RAB34; AIFM1; FAH; LAMA4; CRAT; SLC5A6; DECR1; SLC66A3; LIPE; SLC19A1; GPAM; COQ5; FZD4; COX8A; MDH2; APLP2; CMPK1; ATP1B3; UQCRC1; PEMT; ATP5PO; QDPR; NKIRAS1; SCP2; CCNG2; TANK; AGPAT3; AK2; UCP2; NDUFAB1; PTCD3; SDHB; PREB; UQCR10; NMT1; GPX4; UCK1; HADH; CDKN2C; VEGFB; SLC25A10; CS; TST; DNAJC15; SOD1; COX7B; SUCLG1; DHRS7B; COX6A1; REEP5; DLAT; ELMOD3
WNT_BETA_CATENIN_SIGNALING	Enriched in C	1.15247	0.365496	0.236707	0.358646	42	HEY1; SKP2; LEF1; HEY2; PTCH1; CUL1; PSEN2; CCND2; FZD1; HDAC2; DLL1; KAT2A; AXIN2; RBPJ; NOTCH4; PPARD; FRAT1; JAG2; TP53
SPERMATOGENESIS	Enriched in C	1.17453	0.307112	0.140984	0.234131	134	CCNB2; CDKN3; KIF2C; AURKA; BUB1; EZH2; TLE4; SLC12A2; CLGN; PSMG1; NEK2; RFC4; PEBP1; VDAC3; STAM2; YBX2; NF2; MAST2; ZC3H14; CSNK2A2; RAD17; HSPA4L; STRBP
MITOTIC_SPINDLE	Enriched in C	1.25235	0.308881	0.0546875	0.109375	199	BIRC5; CCNB2; KIF2C; TPX2; AURKA; BUB1; DLGAP5; LMNB1; SSH2; NET1; SAC3D1; KIF4A; ABL1; BCR; PRC1; KIF20B; RAPGEF6; CDC42EP1; SMC1A; WASF1; SEPTIN9; RAB3GAP1; NEK2; KIF11; YWHAE; NCK2; KIF3C; CAPZB; RACGAP1; PXN; NDC80; KIF22; KATNB1; CTTN; FBXO5; NUSAP1; FSCN1; RICTOR; KIF23; ARHGAP27; NIN; SYNPO; TOP2A; ABR; RASA1; CEP57; KNTC1; WASF2; ALS2; TUBGCP2; TBCD; SMC3; EPB41L2; SHROOM2; GSN; CDC42EP2;…
PI3K_AKT_MTOR_SIGNALING	Enriched in C	1.31127	0.354692	0.0446281	0.0970176	105	VAV3; CXCR4; MAPK9; TRAF2; PFN1; CDK2; HRAS; PPP1CA; NFKBIB; PIN1; PTPN11; CFL1; MAPK8; ACACA; GRB2; CDKN1B; RAF1; AP2M1; CSNK2B; HSP90B1; ACTR3; AKT1S1; E2F1; GNA14; ECSIT; MAPK1; ARF1; PLA2G12A; MAPKAP1; RAC1; ARPC3; MKNK2
NOTCH_SIGNALING	Enriched in C	1.3757	0.457887	0.0761421	0.146427	32	HEYL; FZD5; WNT5A; FZD7; LFNG; PSENEN; CUL1; PSEN2; FZD1; DLL1; KAT2A; ST3GAL6; CCND1; PPARD
DNA_REPAIR	Enriched in C	1.64309	0.421674	0.000273593	0.000911978	150	ADA; PRIM1; HPRT1; RFC5; MPG; POLD3; SAC3D1; PCNA; NT5C; COX17; NME1; RFC2; TYMS; TAF10; RPA3; POLA1; CSTF3; RFC4; POLR2J; BOLA2; UPF3B; NUDT21; APRT; MPC2; RPA2; FEN1; SSRP1; POLE4; RAD51; CLP1; GPX4; ZNF707; CANT1; POLR1D; ZWINT; NELFE; GMPR2; POLR2I; NME4; NELFB; SF3A3; TARBP2; POLR1H; BCAP31; POLR2F; POLR3C; NELFCD; RALA; SUPT4H1; ELL; IMPDH2; NT5C3A; DAD1; POLR2E; POLR2G; ERCC4; POLR3GL; POL…
OXIDATIVE_PHOSPHORYLATION	Enriched in C	1.92806	0.475539	4.61080345991257e-08	3.84233621659381e-07	199	LDHA; AIFM1; NDUFC1; DECR1; COX17; NDUFS6; PDP1; NDUFB6; COX8A; MDH2; HSD17B10; SLC25A5; ATP6V1C1; SUCLA2; UQCRC1; NDUFB4; VDAC1; NDUFB8; ATP5F1E; ATP5PO; LDHB; NDUFB2; NDUFV2; ISCA1; FH; ATP6V1E1; COX5A; NDUFA8; MRPS15; NDUFC2; NDUFAB1; ATP5PD; ATP5MC2; IDH2; ATP5F1B; VDAC3; SDHB; NDUFB3; ATP5F1A; COX7A2L; CYB5R3; UQCR10; NDUFS8; MRPL34; TOMM22; GPX4; NDUFA6; ATP5PF; MRPL11; GOT2; ETFA; PDHA1; M…
G2M_CHECKPOINT	Enriched in C	2.27492	0.561089	1.73708969178383e-14	2.17136211472979e-13	199	BIRC5; CCNB2; TROAP; CDC20; BCL3; PTTG1; HMGN2; MEIS1; HMMR; SLC38A1; CDKN3; PBK; KIF2C; TPX2; MCM5; AURKA; HMGA1; BUB1; LMNB1; HNRNPD; UBE2S; MCM3; E2F2; MAD2L1; SFPQ; GINS2; MCM6; CENPA; CHEK1; MCM2; NSD2; EZH2; STMN1; ORC5; CKS1B; H2AZ2; XPO1; SLC12A2; KIF4A; SMC2; ABL1; PRC1; DTYMK; CHAF1A; ORC6; KIF20B; EXO1; TMPO; SMC1A; TFDP1; BARD1; NEK2; KIF11; HMGB3; CDC45; PTTG3P; FANCC; H2AZ1; HNRNPU;…
MYC_TARGETS_V1	Enriched in C	2.48327	0.612477	3.44352779499492e-20	5.7392129916582e-19	199	CDC20; RPS2; HNRNPA2B1; MCM5; HPRT1; RUVBL2; HNRNPD; MAD2L1; MCM6; MCM2; HDGF; LDHA; HDDC2; SRSF3; PPIA; PSMA7; PCNA; HNRNPR; HNRNPA3; SNRPA; CBX3; PSMA2; POLD2; CDK2; XPO1; NME1; TARDBP; CCT7; NHP2; RANBP1; RACK1; TYMS; PSMB2; HNRNPC; CCT5; MCM7; SET; C1QBP; TFDP1; YWHAE; FBL; RFC4; VDAC1; DEK; DHX15; CDC45; RPS3; RPLP0; PSMA4; H2AZ1; YWHAQ; SNRPD2; MRPS18B; HNRNPU; MRPL23; PSMD8; EXOSC7; COX5A;…
E2F_TARGETS	Enriched in C	2.53651	0.625919	6.06538199251029e-22	1.51634549812757e-20	200	BIRC5; CCNB2; CDC20; PTTG1; CCNE1; CDCA8; HMMR; SPAG5; CDKN3; KIF2C; MCM5; HMGB2; CDCA3; CIT; AURKA; HMGA1; DLGAP5; LMNB1; HNRNPD; UBE2S; RNASEH2A; MCM3; MAD2L1; MCM6; CHEK1; MCM2; NCAPD2; MSH2; ANP32E; GINS1; POLD3; PCNA; TIMELESS; EZH2; STMN1; CENPM; TUBB; DCTPP1; CKS1B; POLD2; PSMC3IP; DEPDC1; TUBG1; XPO1; NME1; KIF4A; UBE2T; SNRPB; ASF1B; ZW10; RANBP1; RFC2; SLBP; ORC6; EXOSC8; TMPO; SMC1A; M…
Notes: Comprehensive gene set enrichment analysis (25) results based on the Hallmark collection. Each pathway is listed with its normalized enrichment score (NES), nominal P-value, and false discovery rate (FDR). Used to generate Fig. 3c.
